# Supplementary material
Source: Springer Nature journal article supplement (https://www.springermedizin.de/resource/supplementary/12958_2009_601_MOESM1_ESM.pdf/9568068)

**A**

IVF rates

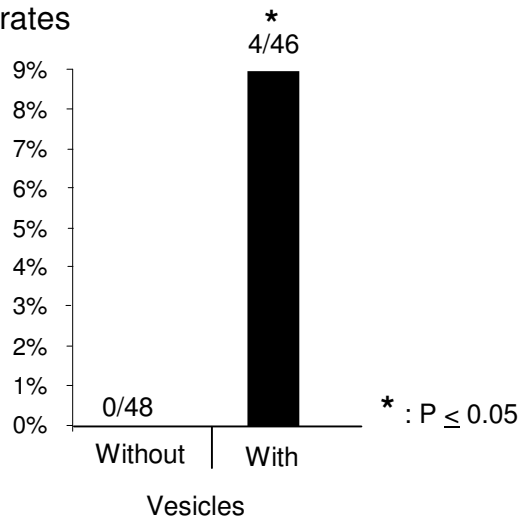**B**

Equine cell monolayer

Porcine cell monolayer

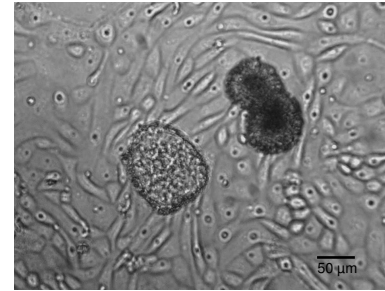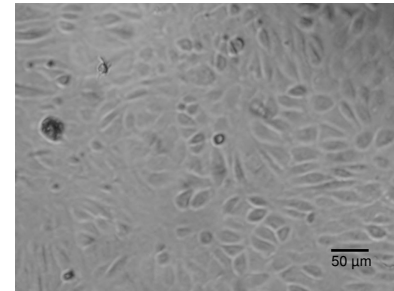**C**

IVF rates

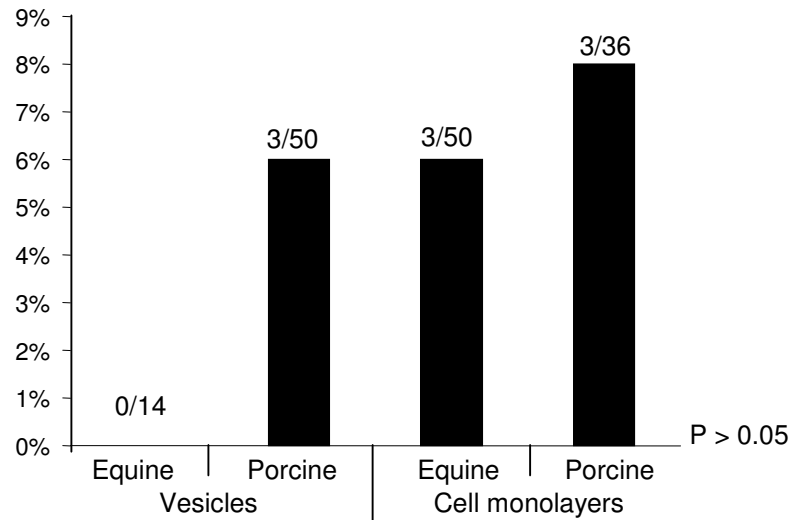**D**

IVF rates

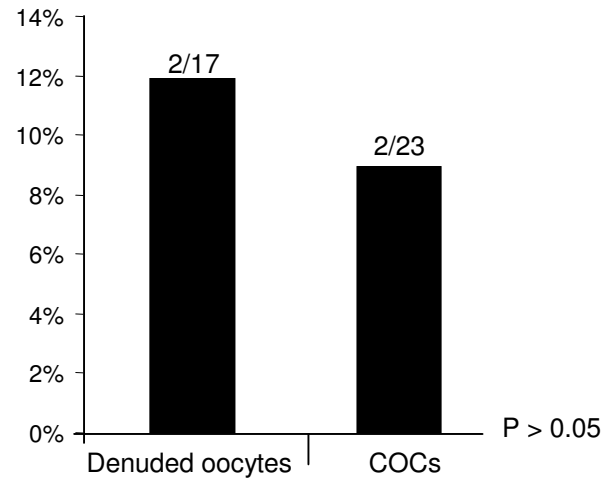

Supplement: MOESM1 [file 9568068]
